# Supplementary material
Source: publisher figshare collection journal article supplement (https://acs.figshare.com/ndownloader/files/5667675)
Supplement: Supplementary file 1 [file 5667675]

#data_global
# 1. SUBMISSION DETAILS

_publ_contact_author_name       'Jonathan S. Lindsey'
_publ_contact_author_address
;
Department of Chemistry
North Carolina State University
Raleigh, NC 27695-8204
;
_publ_contact_author_phone     '1(919)5156406'
_publ_contact_author_fax       '1(919)5155079'
_publ_contact_author_email     'jlindsey@ncsu.edu'

_publ_requested_journal         'test'
_publ_requested_category       ?
_publ_requested_coeditor_name  ?

_publ_contact_letter
;
   ? #Insert text if wanted
;

#===================================================================== 
==========

# 2. PROCESSING SUMMARY  (IUCr Office Use Only)

_journal_date_recd_electronic  ?
_journal_date_to_coeditor      ?
_journal_date_from_coeditor    ?
_journal_date_accepted         ?
_journal_date_printers_first   ?
_journal_date_printers_final   ?
_journal_date_proofs_out       ?
_journal_date_proofs_in        ?
_journal_coeditor_name         ?
_journal_coeditor_code         ?
_journal_coeditor_notes
; ?
;
_journal_techeditor_code       ?
_journal_techeditor_notes
; ?
;
_journal_coden_ASTM            ?
_journal_name_full             ?
_journal_year                  ?
_journal_volume                ?
_journal_issue                 ?
_journal_page_first            ?
_journal_page_last             ?
_journal_suppl_publ_number      ?
_journal_suppl_publ_pages       ?

#===================================================================== 
==========

# 3. TITLE AND AUTHOR LIST

_publ_section_title
;
Excited-State Energy Transfer Dynamics in Self Assembled Triads Composed
of Two Porphyrins and an Intervening Bis(dipyrrinato)metal Complex
;
# The loop structure below should contain the names and addresses of all
# authors, in the required order of publication. Repeat as necessary.

loop_
          _publ_author_name
          _publ_author_address
'Yu, Lianhe'
;Department of Chemistry
North Carolina State University
Raleigh, NC 27695-8204
USA
;
'Muthukumaran, Kannan'
;Department of Chemistry
North Carolina State University
Raleigh, NC 27695-8204
USA
;
'Sazanovich, Igor'
;Department of Chemistry
Washington University
St. Louis, MO 63130-4889
USA
;
'Kirmaier, Christine'
;Department of Chemistry
Washington University
St. Louis, MO 63130-4889
USA
;
'Hindin, Eve'
;Department of Chemistry
Washington University
St. Louis, MO 63130-4889
USA
;
'Diers, James R.'
;Department of Chemistry
University of California
Riverside, CA 92521-0403
USA
;
Boyle, Paul D.'
;Department of Chemistry
North Carolina State University
Raleigh, NC 27695-8204
USA
;
'Bocian, David F.'
;Department of Chemistry
University of California
Riverside, CA 92521-0403
USA
;
'Holten, Dewey'
;Department of Chemistry
Washington University
St. Louis, MO 63130-4889
USA
;
'Lindsey, Jonathan S.'
;Department of Chemistry
North Carolina State University
Raleigh, NC 27695-8204
USA
;

#===================================================================== 
==========
# If more than one structure is reported, sections 5-10 should be filled in
# per structure.  For each data set, replace the ? in the data_? line below
# by a unique identifier.

data_Zn-2a

#===================================================================== 
==========

# 5. CHEMICAL DATA

_chemical_name_systematic
;
Bis(5-phenyldipyrrinato)zinc(II)
;
_chemical_name_common             ?
_chemical_formula_moiety         'C31 H23 Cl3 N4 Zn '
_chemical_formula_structural     ?
_chemical_formula_analytical     ?
_chemical_formula_sum            'C31 H23 Cl3 N4 Zn '
_chemical_formula_weight         623.28
_chemical_compound_source        'laboratory synthesis'

loop_
       _atom_type_symbol
       _atom_type_description
       _atom_type_scat_dispersion_real
       _atom_type_scat_dispersion_imag
       _atom_type_scat_source
    C     ?   .003   .002 'International Tables Vol. IV Table 2.2B'
    H     ?   .000   .000 'International Tables Vol. IV Table 2.2B'
    Cl    ?   .148   .159 'International Tables Vol. IV Table 2.2B'
    N     ?   .006   .003 'International Tables Vol. IV Table 2.2B'
    Zn    ?   .284  1.430 'International Tables Vol. IV Table 2.2B'

#===================================================================== 
==========

# 6. CRYSTAL DATA

_symmetry_cell_setting            monoclinic
_symmetry_space_group_name_H-M    'C 2/c'

loop_
       _symmetry_equiv_pos_as_xyz

     x,y,z
     -x,-y,-z
     1/2+x,1/2+y,z
     1/2-x,1/2-y,-z
     -x,y,1/2-z
     x,-y,1/2+z
     1/2-x,1/2+y,1/2-z
     1/2+x,1/2-y,1/2+z
_cell_length_a                     25.478(5)
_cell_length_b                     10.9632(10)
_cell_length_c                     22.143(4)
_cell_angle_alpha                  90.0
_cell_angle_beta                  111.866(16)
_cell_angle_gamma                  90.0
_cell_volume                     5740.0(16)
_cell_formula_units_Z               8
_cell_measurement_temperature      148
_cell_measurement_reflns_used        25
_cell_measurement_theta_min        15.00
_cell_measurement_theta_max        18.00
_cell_special_details
;
   ?  #Insert any comments here.
;
_exptl_crystal_description        plate
_exptl_crystal_colour             yellow
_exptl_crystal_size_max            .38
_exptl_crystal_size_mid            .18
_exptl_crystal_size_min            .12
_exptl_crystal_size_rad           ?
_exptl_crystal_density_meas       ?
_exptl_crystal_density_diffrn     1.443
_exptl_crystal_density_method     ?
_exptl_crystal_F_000             2551.13
_exptl_absorpt_coefficient_mu     1.16
_exptl_absorpt_correction_type    psi-scan
_exptl_absorpt_process_details   'NRCVAX ABSORP'
_exptl_absorpt_correction_T_min    .8427
_exptl_absorpt_correction_T_max    .9976

#===================================================================== 
==========

# 7. EXPERIMENTAL DATA

_exptl_special_details
;
A quadrant of unique data were collected using the \w scan mode in
non-bisecting geometry.  The adoption of a non-bisecting scan mode was
accomplished by offsetting \y by 20 deg for each data point collected.
This was done to minimize the interaction of the goniometer head with
the cold stream.  Three standard reflections were measured every 4800
seconds of X-ray exposure time.
;

_diffrn_ambient_temperature      148
_diffrn_radiation_wavelength      .71073
_diffrn_radiation_type           'Molybdenum K\a'
_diffrn_radiation_source         'xray tube'

_diffrn_radiation_monochromator  graphite
_diffrn_measurement_device       'Nonius CAD-4    '
_diffrn_measurement_method       'Omega scan b/P/b        '
_diffrn_standards_number           3
_diffrn_standards_interval_time   80
_diffrn_standards_decay_%          1.9
loop_
       _diffrn_standard_refln_index_h
       _diffrn_standard_refln_index_k
       _diffrn_standard_refln_index_l
       -6   2   4
       -2   2   6
       -8  -4  -1

_diffrn_reflns_number             5016
_diffrn_reflns_av_R_equivalents   .000
_diffrn_reflns_av_sigmaI/netI    ?
_diffrn_reflns_limit_h_min      -30
_diffrn_reflns_limit_h_max       28
_diffrn_reflns_limit_k_min        0
_diffrn_reflns_limit_k_max       12
_diffrn_reflns_limit_l_min        0
_diffrn_reflns_limit_l_max       26
_diffrn_reflns_theta_min         1.20
_diffrn_reflns_theta_max        25.00
_diffrn_reflns_reduction_process ?

_reflns_number_total              5016
_reflns_number_gt                 3334
_reflns_threshold_expression      'Inet > 1.0\s(Inet)'

_computing_data_collection       'Nonius CAD4 Argus'
_computing_cell_refinement       'Nonius CAD4 Argus'
_computing_data_reduction        'NRCVAX DATRD2'
_computing_structure_solution    'SIR92'
_computing_structure_refinement  'NRCVAX LSTSQ'
_computing_molecular_graphics    'NRCVAX'
_computing_publication_material  'NRCVAX TABLES Jan 94 Version'

#===================================================================== 
==========

# 8. REFINEMENT DATA

_refine_special_details
;
   ?  #Insert any special details here.
;

_refine_ls_structure_factor_coef  F
_refine_ls_matrix_type            full
_refine_ls_weighting_scheme         sigma
_refine_ls_weighting_details      '1/(\s^2^(F)+ .0003F^2^) '
_refine_ls_hydrogen_treatment     constr
_refine_ls_extinction_method      none
_refine_ls_extinction_coef        0.0
_refine_ls_number_reflns          3330
_refine_ls_number_parameters       353
_refine_ls_number_restraints      ?
_refine_ls_number_constraints     ?
_refine_ls_R_factor_all            .116
_refine_ls_R_factor_gt             .064
_refine_ls_wR_factor_all           .079
_refine_ls_wR_factor_ref           .077
_refine_ls_goodness_of_fit_all    ?
_refine_ls_goodness_of_fit_ref    2.59
_refine_ls_restrained_S_all       ?
_refine_ls_restrained_S_obs       ?
_refine_ls_shift/su_max           .000
_refine_ls_shift/su_mean         ?
_refine_diff_density_max          1.46
_refine_diff_density_min         -1.26

#===================================================================== 
==========

# 9. ATOMIC COORDINATES AND THERMAL PARAMETERS

loop_
       _atom_site_label
       _atom_site_fract_x
       _atom_site_fract_y
       _atom_site_fract_z
       _atom_site_U_iso_or_equiv
       _atom_site_adp_type
       _atom_site_calc_flag
       _atom_site_refinement_flags
       _atom_site_type_symbol
Zn1   .00000   .95541(10)   .75000   .0168(6)  Uani ?   S  Zn
N1   .0247(2)   .8655(5)   .6876(3)   .019(3)  Uani ?   .  N
N2   .0721(2)  1.0441(5)   .7899(2)   .016(3)  Uani ?   .  N
C1  -.0034(3)   .7816(6)   .6432(3)   .018(4)  Uani ?   .  C
C2   .0286(3)   .7353(7)   .6092(3)   .027(4)  Uani ?   .  C
C3   .0803(3)   .7946(7)   .6346(3)   .025(4)  Uani ?   .  C
C4   .0782(3)   .8761(5)   .6840(3)   .015(3)  Uani ?   .  C
C5   .1216(2)   .9503(6)   .7242(3)   .015(3)  Uani ?   .  C
C6   .1192(2)  1.0287(5)   .7730(3)   .013(3)  Uani ?   .  C
C7   .1626(2)  1.1063(6)   .8124(3)   .019(4)  Uani ?   .  C
C8   .1425(3)  1.1675(7)   .8521(3)   .027(4)  Uani ?   .  C
C9   .0863(3)  1.1300(6)   .8372(3)   .021(4)  Uani ?   .  C
C10   .1762(2)   .9499(6)   .7135(3)   .016(3)  Uani ?   .  C
C11   .1900(3)  1.0432(6)   .6808(3)   .022(4)  Uani ?   .  C
C12   .2415(3)  1.0418(7)   .6721(3)   .028(4)  Uani ?   .  C
C13   .2793(3)   .9492(7)   .6966(4)   .030(4)  Uani ?   .  C
C14   .2660(3)   .8551(8)   .7294(4)   .038(5)  Uani ?   .  C
C15   .2144(3)   .8538(7)   .7378(4)   .031(5)  Uani ?   .  C
Zn2   .00000   .45503(11)   .75000   .0180(7)  Uani ?   S  Zn
N1'   .0681(2)   .5470(5)   .8056(3)   .019(3)  Uani ?   .  N
N2'  -.0087(2)   .3658(5)   .8231(2)   .016(3)  Uani ?   .  N
C1'   .0950(3)   .6340(6)   .7889(3)   .021(4)  Uani ?   .  C
C2'   .1384(3)   .6872(6)   .8441(4)   .022(4)  Uani ?   .  C
C3'   .1364(3)   .6227(6)   .8966(3)   .022(4)  Uani ?   .  C
C4'   .0926(3)   .5353(6)   .8735(3)   .020(3)  Uani ?   .  C
C5'   .0735(3)   .4545(6)   .9106(3)   .019(3)  Uani ?   .  C
C6'   .0280(2)   .3745(6)   .8881(3)   .017(3)  Uani ?   .  C
C7'   .0108(3)   .2876(6)   .9248(3)   .023(4)  Uani ?   .  C
C8'  -.0350(3)   .2272(7)   .8827(3)   .025(4)  Uani ?   .  C
C9'  -.0460(3)   .2769(7)   .8210(3)   .025(4)  Uani ?   .  C
C10'   .1073(3)   .4542(6)   .9826(3)   .023(4)  Uani ?   .  C
C11'   .0881(3)   .5087(7)  1.0257(3)   .035(4)  Uani ?   .  C
C12'   .1200(4)   .5075(7)  1.0920(4)   .038(5)  Uani ?   .  C
C13'   .1721(3)   .4545(8)  1.1156(3)   .034(4)  Uani ?   .  C
C14'   .1919(4)   .4037(12)  1.0723(4)   .080(7)  Uani ?   .  C
C15'   .1605(4)   .4025(11)  1.0059(4)   .064(6)  Uani ?   .  C
C1s  -.1444(4)   .0572(11)   .0203(4)   .069(7)  Uani ?   .  C
Cl1s  -.21169(11)   .0895(3)   .01282(15)   .085(2)  Uani ?   .  Cl
Cl2s  -.12107(18)   .1764(5)  -.01692(17)   .159(4)  Uani ?   .  Cl
Cl3s  -.1395(3)  -.0809(5)  -.01221(16)   .230(6)  Uani ?   .  Cl
H1  -.041   .756   .636   .0299  Uiso  ?  .  H
H2   .017   .675   .575   .0385  Uiso  ?  .  H
H3   .112   .783   .622   .0351  Uiso  ?  .  H
H7   .200  1.114   .811   .0297  Uiso  ?  .  H
H8   .163  1.226   .884   .0355  Uiso  ?  .  H
H9   .062  1.160   .858   .0323  Uiso  ?  .  H
H11   .164  1.110   .664   .0333  Uiso  ?  .  H
H12   .251  1.107   .649   .0406  Uiso  ?  .  H
H13   .315   .950   .691   .0430  Uiso  ?  .  H
H14   .293   .790   .747   .0483  Uiso  ?  .  H
H15   .205   .787   .760   .0419  Uiso  ?  .  H
H1'   .087   .658   .745   .0323  Uiso  ?  .  H
H2'   .163   .753   .844   .0325  Uiso  ?  .  H
H3'   .161   .635   .941   .0324  Uiso  ?  .  H
H7'   .028   .274   .971   .0330  Uiso  ?  .  H
H8'  -.056   .163   .893   .0353  Uiso  ?  .  H
H9'  -.076   .251   .782   .0337  Uiso  ?  .  H
H11'   .052   .549  1.010   .0450  Uiso  ?  .  H
H12'   .105   .545  1.122   .0500  Uiso  ?  .  H
H13'   .194   .452  1.162   .0417  Uiso  ?  .  H
H14'   .229   .368  1.088   .0827  Uiso  ?  .  H
H15'   .176   .368   .976   .0697  Uiso  ?  .  H
H1s  -.120   .057   .065   .0768  Uiso  ?  .  H

loop_
       _atom_site_aniso_label
       _atom_site_aniso_U_11
       _atom_site_aniso_U_22
       _atom_site_aniso_U_33
       _atom_site_aniso_U_12
       _atom_site_aniso_U_13
       _atom_site_aniso_U_23
       _atom_site_aniso_type_symbol
Zn1 .0156(6) .0171(6) .0212(6) .00000 .0109(5) .00000 Zn
N1 .013(3) .021(3) .023(3) .000(2) .006(2) .001(3) N
N2 .015(3) .015(3) .022(3) -.001(2) .011(2) .000(3) N
C1 .017(3) .012(3) .031(4) -.003(3) .014(3) .002(3) C
C2 .031(4) .028(5) .026(4) -.006(3) .017(3) -.011(3) C
C3 .024(3) .027(4) .024(3) -.001(3) .011(3) -.006(3) C
C4 .020(3) .009(3) .020(3) .000(3) .012(3) .003(3) C
C5 .018(3) .007(3) .023(3) .004(3) .012(3) .005(3) C
C6 .015(3) .007(3) .023(3) .000(3) .014(3) .007(3) C
C7 .015(3) .020(4) .024(3) -.003(3) .010(3) .003(3) C
C8 .027(4) .028(4) .021(4) -.006(3) .003(3) -.008(3) C
C9 .021(3) .018(4) .027(4) .011(3) .015(3) -.004(3) C
C10 .017(3) .009(3) .025(3) -.002(3) .014(3) -.008(3) C
C11 .019(3) .023(4) .028(4) .001(3) .013(3) -.004(3) C
C12 .025(4) .029(4) .038(4) -.006(4) .021(3) .001(4) C
C13 .021(3) .034(4) .044(4) -.009(4) .023(3) -.015(4) C
C14 .027(4) .042(5) .047(5) .005(4) .016(4) -.008(4) C
C15 .025(4) .029(4) .041(4) .001(3) .015(3) .001(4) C
Zn2 .0172(6) .0185(7) .0183(6) .00000 .0066(5) .00000 Zn
N1' .014(3) .019(3) .024(3) -.002(3) .009(2) .005(3) N
N2' .016(3) .013(3) .020(3) -.009(2) .009(2) -.002(2) N
C1' .016(3) .021(4) .031(4) -.003(3) .012(3) .006(3) C
C2' .017(3) .011(4) .039(4) -.004(3) .013(3) .005(3) C
C3' .017(3) .018(4) .032(4) -.005(3) .009(3) .001(3) C
C4' .018(3) .019(4) .023(3) .005(3) .007(3) -.003(3) C
C5' .021(3) .017(3) .021(3) .003(3) .007(3) -.003(3) C
C6' .014(3) .016(4) .021(3) -.007(3) .007(3) .004(3) C
C7' .024(3) .028(4) .017(3) .003(3) .007(3) .003(3) C
C8' .024(4) .027(5) .025(4) -.009(3) .011(3) -.004(3) C
C9' .021(4) .032(4) .018(3) -.003(3) .003(3) -.006(3) C
C10' .018(3) .022(4) .024(3) -.007(3) .004(3) -.007(3) C
C11' .046(5) .038(5) .021(4) .017(4) .013(4) .009(3) C
C12' .054(5) .039(5) .027(4) .006(4) .022(4) -.002(4) C
C13' .030(4) .044(5) .021(4) -.009(4) .001(3) -.001(4) C
C14' .045(5) .144(11) .028(5) .040(7) -.013(4) -.024(6) C
C15' .040(5) .109(9) .031(5) .038(6) -.001(4) -.022(5) C
C1s .074(7) .093(9) .033(5) .028(7) .014(5) .005(6) C
Cl1s .0451(14) .115(3) .094(2) -.0102(16) .0248(14) -.0201(19) Cl
Cl2s .162(4) .271(6) .079(2) -.155(4) .087(2) -.094(3) Cl
Cl3s .450(9) .183(5) .0535(19) .248(6) .088(4) .043(2) Cl

#===================================================================== 
==========

# 10. MOLECULAR GEOMETRY

loop_
       _geom_bond_atom_site_label_1
       _geom_bond_atom_site_label_2
       _geom_bond_distance
       _geom_bond_site_symmetry_1
       _geom_bond_site_symmetry_2
       _geom_bond_publ_flag
    Zn1 N1    1.980(5)  ?  ?  ?
    Zn1 N1    1.980(5)  ?  5_556  ?
    Zn1 N2    1.972(5)  ?  ?  ?
    Zn1 N2    1.972(5)  ?  5_556  ?
    N1 C1     1.343(8)  ?  ?  ?
    N1 C4     1.399(8)  ?  ?  ?
    N2 C6     1.393(7)  ?  ?  ?
    N2 C9     1.353(8)  ?  ?  ?
    C1 C2     1.394(9)  ?  ?  ?
    C1 H1      .960(6)  ?  ?  ?
    C2 C3     1.386(10)  ?  ?  ?
    C2 H2      .960(7)  ?  ?  ?
    C3 C4     1.428(9)  ?  ?  ?
    C3 H3      .960(6)  ?  ?  ?
    C4 C5     1.395(9)  ?  ?  ?
    C5 C6     1.400(8)  ?  ?  ?
    C5 C10    1.495(8)  ?  ?  ?
    C6 C7     1.411(9)  ?  ?  ?
    C7 C8     1.349(9)  ?  ?  ?
    C7 H7      .960(6)  ?  ?  ?
    C8 C9     1.406(10)  ?  ?  ?
    C8 H8      .960(7)  ?  ?  ?
    C9 H9      .960(6)  ?  ?  ?
    C10 C11   1.373(9)  ?  ?  ?
    C10 C15   1.400(10)  ?  ?  ?
    C11 C12   1.395(9)  ?  ?  ?
    C11 H11    .960(7)  ?  ?  ?
    C12 C13   1.364(11)  ?  ?  ?
    C12 H12    .960(7)  ?  ?  ?
    C13 C14   1.374(12)  ?  ?  ?
    C13 H13    .960(6)  ?  ?  ?
    C14 C15   1.395(10)  ?  ?  ?
    C14 H14    .960(8)  ?  ?  ?
    C15 H15    .960(7)  ?  ?  ?
    Zn2 N1'   1.987(5)  ?  ?  ?
    Zn2 N1'   1.987(5)  ?  5_556  ?
    Zn2 N2'   1.973(5)  ?  ?  ?
    Zn2 N2'   1.973(5)  ?  5_556  ?
    N1' C1'   1.306(8)  ?  ?  ?
    N1' C4'   1.404(8)  ?  ?  ?
    N2' C6'   1.397(8)  ?  ?  ?
    N2' C9'   1.350(8)  ?  ?  ?
    C1' C2'   1.431(10)  ?  ?  ?
    C1' H1'    .960(6)  ?  ?  ?
    C2' C3'   1.379(9)  ?  ?  ?
    C2' H2'    .960(6)  ?  ?  ?
    C3' C4'   1.416(9)  ?  ?  ?
    C3' H3'    .960(7)  ?  ?  ?
    C4' C5'   1.411(9)  ?  ?  ?
    C5' C6'   1.391(9)  ?  ?  ?
    C5' C10'  1.503(9)  ?  ?  ?
    C6' C7'   1.424(9)  ?  ?  ?
    C7' C8'   1.362(9)  ?  ?  ?
    C7' H7'    .960(6)  ?  ?  ?
    C8' C9'   1.398(10)  ?  ?  ?
    C8' H8'    .960(7)  ?  ?  ?
    C9' H9'    .960(6)  ?  ?  ?
    C10' C11' 1.362(10)  ?  ?  ?
    C10' C15' 1.380(10)  ?  ?  ?
    C11' C12' 1.388(10)  ?  ?  ?
    C11' H11'  .960(7)  ?  ?  ?
    C12' C13' 1.363(11)  ?  ?  ?
    C12' H12'  .960(7)  ?  ?  ?
    C13' C14' 1.357(12)  ?  ?  ?
    C13' H13'  .960(7)  ?  ?  ?
    C14' C15' 1.389(11)  ?  ?  ?
    C14' H14'  .960(9)  ?  ?  ?
    C15' H15'  .960(8)  ?  ?  ?
    C1s Cl1s  1.698(11)  ?  ?  ?
    C1s Cl2s  1.761(12)  ?  ?  ?
    C1s Cl3s  1.700(12)  ?  ?  ?
    C1s H1s    .960(9)  ?  ?  ?

loop_
       _geom_angle_atom_site_label_1
       _geom_angle_atom_site_label_2
       _geom_angle_atom_site_label_3
       _geom_angle
       _geom_angle_site_symmetry_1
       _geom_angle_site_symmetry_2
       _geom_angle_site_symmetry_3
       _geom_angle_publ_flag
    N1 Zn1 N1      120.3(2)  ?  ?  5_556  ?
    N1 Zn1 N2       94.2(2)  ?  ?  ?  ?
    N1 Zn1 N2      114.6(2)  ?  ?  5_556  ?
    N1  Zn1 N2     114.6(2)  5_556  ?  ?  ?
    N1  Zn1 N2      94.2(2)  5_556  ?  5_556  ?
    N2 Zn1 N2      121.0(2)  ?  ?  5_556  ?
    Zn1 N1 C1      129.2(4)  ?  ?  ?  ?
    Zn1 N1 C4      124.6(4)  ?  ?  ?  ?
    C1 N1 C4       106.2(5)  ?  ?  ?  ?
    Zn1 N2 C6      124.8(4)  ?  ?  ?  ?
    Zn1 N2 C9      128.8(4)  ?  ?  ?  ?
    C6 N2 C9       106.5(5)  ?  ?  ?  ?
    N1 C1 C2       112.7(5)  ?  ?  ?  ?
    N1 C1 H1       123.3(6)  ?  ?  ?  ?
    C2 C1 H1       124.0(6)  ?  ?  ?  ?
    C1 C2 C3       105.6(6)  ?  ?  ?  ?
    C1 C2 H2       127.0(7)  ?  ?  ?  ?
    C3 C2 H2       127.5(6)  ?  ?  ?  ?
    C2 C3 C4       107.6(5)  ?  ?  ?  ?
    C2 C3 H3       126.3(7)  ?  ?  ?  ?
    C4 C3 H3       126.0(6)  ?  ?  ?  ?
    N1 C4 C3       107.9(5)  ?  ?  ?  ?
    N1 C4 C5       124.7(5)  ?  ?  ?  ?
    C3 C4 C5       127.3(5)  ?  ?  ?  ?
    C4 C5 C6       126.7(5)  ?  ?  ?  ?
    C4 C5 C10      117.5(5)  ?  ?  ?  ?
    C6 C5 C10      115.8(5)  ?  ?  ?  ?
    N2 C6 C5       124.9(5)  ?  ?  ?  ?
    N2 C6 C7       108.4(5)  ?  ?  ?  ?
    C5 C6 C7       126.7(5)  ?  ?  ?  ?
    C6 C7 C8       107.7(5)  ?  ?  ?  ?
    C6 C7 H7       126.0(6)  ?  ?  ?  ?
    C8 C7 H7       126.4(7)  ?  ?  ?  ?
    C7 C8 C9       107.5(6)  ?  ?  ?  ?
    C7 C8 H8       126.1(7)  ?  ?  ?  ?
    C9 C8 H8       126.4(7)  ?  ?  ?  ?
    N2 C9 C8       110.0(5)  ?  ?  ?  ?
    N2 C9 H9       125.0(6)  ?  ?  ?  ?
    C8 C9 H9       125.1(7)  ?  ?  ?  ?
    C5 C10 C11     121.2(6)  ?  ?  ?  ?
    C5 C10 C15     119.8(6)  ?  ?  ?  ?
    C11 C10 C15    119.0(5)  ?  ?  ?  ?
    C10 C11 C12    120.3(6)  ?  ?  ?  ?
    C10 C11 H11    119.7(6)  ?  ?  ?  ?
    C12 C11 H11    120.0(7)  ?  ?  ?  ?
    C11 C12 C13    120.9(6)  ?  ?  ?  ?
    C11 C12 H12    119.6(7)  ?  ?  ?  ?
    C13 C12 H12    119.5(6)  ?  ?  ?  ?
    C12 C13 C14    119.6(6)  ?  ?  ?  ?
    C12 C13 H13    120.1(8)  ?  ?  ?  ?
    C14 C13 H13    120.3(8)  ?  ?  ?  ?
    C13 C14 C15    120.5(7)  ?  ?  ?  ?
    C13 C14 H14    119.6(7)  ?  ?  ?  ?
    C15 C14 H14    119.9(8)  ?  ?  ?  ?
    C10 C15 C14    119.7(7)  ?  ?  ?  ?
    C10 C15 H15    120.0(6)  ?  ?  ?  ?
    C14 C15 H15    120.3(7)  ?  ?  ?  ?
    N1' Zn2 N1'    119.0(2)  ?  ?  5_556  ?
    N1' Zn2 N2'     94.7(2)  ?  ?  ?  ?
    N1' Zn2 N2'    114.9(2)  ?  ?  5_556  ?
    N1'  Zn2 N2'   114.9(2)  5_556  ?  ?  ?
    N1'  Zn2 N2'    94.7(2)  5_556  ?  5_556  ?
    N2' Zn2 N2'    120.5(2)  ?  ?  5_556  ?
    Zn2 N1' C1'    128.7(4)  ?  ?  ?  ?
    Zn2 N1' C4'    123.7(4)  ?  ?  ?  ?
    C1' N1' C4'    107.4(5)  ?  ?  ?  ?
    Zn2 N2' C6'    125.0(4)  ?  ?  ?  ?
    Zn2 N2' C9'    128.5(4)  ?  ?  ?  ?
    C6' N2' C9'    106.1(5)  ?  ?  ?  ?
    N1' C1' C2'    112.2(6)  ?  ?  ?  ?
    N1' C1' H1'    123.7(6)  ?  ?  ?  ?
    C2' C1' H1'    124.1(6)  ?  ?  ?  ?
    C1' C2' C3'    104.6(5)  ?  ?  ?  ?
    C1' C2' H2'    127.6(7)  ?  ?  ?  ?
    C3' C2' H2'    127.8(7)  ?  ?  ?  ?
    C2' C3' C4'    108.3(6)  ?  ?  ?  ?
    C2' C3' H3'    125.9(6)  ?  ?  ?  ?
    C4' C3' H3'    125.8(6)  ?  ?  ?  ?
    N1' C4' C3'    107.5(5)  ?  ?  ?  ?
    N1' C4' C5'    124.7(6)  ?  ?  ?  ?
    C3' C4' C5'    127.7(6)  ?  ?  ?  ?
    C4' C5' C6'    127.5(6)  ?  ?  ?  ?
    C4' C5' C10'   115.7(5)  ?  ?  ?  ?
    C6' C5' C10'   116.8(6)  ?  ?  ?  ?
    N2' C6' C5'    124.2(5)  ?  ?  ?  ?
    N2' C6' C7'    108.2(5)  ?  ?  ?  ?
    C5' C6' C7'    127.6(6)  ?  ?  ?  ?
    C6' C7' C8'    107.5(6)  ?  ?  ?  ?
    C6' C7' H7'    126.3(6)  ?  ?  ?  ?
    C8' C7' H7'    126.2(7)  ?  ?  ?  ?
    C7' C8' C9'    106.8(6)  ?  ?  ?  ?
    C7' C8' H8'    126.6(7)  ?  ?  ?  ?
    C9' C8' H8'    126.5(7)  ?  ?  ?  ?
    N2' C9' C8'    111.4(6)  ?  ?  ?  ?
    N2' C9' H9'    124.2(7)  ?  ?  ?  ?
    C8' C9' H9'    124.4(7)  ?  ?  ?  ?
    C5' C10' C11'  122.0(6)  ?  ?  ?  ?
    C5' C10' C15'  119.4(6)  ?  ?  ?  ?
    C11' C10' C15' 118.5(6)  ?  ?  ?  ?
    C10' C11' C12' 121.0(7)  ?  ?  ?  ?
    C10' C11' H11' 118.9(7)  ?  ?  ?  ?
    C12' C11' H11' 120.0(7)  ?  ?  ?  ?
    C11' C12' C13' 120.9(7)  ?  ?  ?  ?
    C11' C12' H12' 119.7(8)  ?  ?  ?  ?
    C13' C12' H12' 119.4(7)  ?  ?  ?  ?
    C12' C13' C14' 118.0(7)  ?  ?  ?  ?
    C12' C13' H13' 120.9(7)  ?  ?  ?  ?
    C14' C13' H13' 121.1(8)  ?  ?  ?  ?
    C13' C14' C15' 122.2(8)  ?  ?  ?  ?
    C13' C14' H14' 118.8(8)  ?  ?  ?  ?
    C15' C14' H14' 119.0(9)  ?  ?  ?  ?
    C10' C15' C14' 119.4(7)  ?  ?  ?  ?
    C10' C15' H15' 119.7(8)  ?  ?  ?  ?
    C14' C15' H15' 120.9(8)  ?  ?  ?  ?
    Cl1s C1s Cl2s  107.7(6)  ?  ?  ?  ?
    Cl1s C1s Cl3s  112.0(7)  ?  ?  ?  ?
    Cl1s C1s H1s   109.4(8)  ?  ?  ?  ?
    Cl2s C1s Cl3s  111.9(6)  ?  ?  ?  ?
    Cl2s C1s H1s   107.2(9)  ?  ?  ?  ?
    Cl3s C1s H1s   108.5(8)  ?  ?  ?  ?

#===END
